# Supplementary material for: Towards water-free biobanks: long-term dry-preservation at room temperature of desiccation-sensitive enzyme luciferase in air-dried insect cells
Source: PubMed Central journal article supplement (PMC5529557; doi:10.1038/s41598-017-06945-y), 2017-07-26
Supplement: 41598_2017_6945_MOESM1_ESM.pdf [file 41598_2017_6945_MOESM1_ESM.pdf]

## **Towards water-free biobanks: long-term dry-preservation at room temperature of desiccation-sensitive enzyme luciferase in air-dried insect cells**

**Short title: Enzyme preservation at room temperature in air-dried insect cells**

\*Shingo Kikuta<sup>1</sup>, Shunsuke J. Watanabe<sup>1</sup>, Ryoichi Sato<sup>1</sup>, Oleg Gusev<sup>2,3,4</sup>, Alexander Nesmelov<sup>4</sup>, Yoichiro Sogame<sup>5</sup>, Richard Cornette<sup>5</sup>, \*Takahiro Kikawada<sup>5,6</sup>

<sup>1</sup>Graduate School of Bio-Applications and Systems Engineering, Tokyo University of Agriculture and Technology, Koganei, Tokyo 184-8588, Japan

<sup>2</sup>Division of Genomic Technologies, RIKEN Center for Life Science Technologies, Yokohama, Kanagawa 230-0045, Japan

<sup>3</sup>RIKEN Preventive Medicine & Diagnosis Innovation Program, RIKEN, Wako, Saitama 351-0198, Japan

<sup>4</sup>Institute of fundamental Medicine and Biology, Kazan Federal University, Kazan 420008, Russia

<sup>5</sup>Institute of Agrobiological Sciences, NARO, Tsukuba, Ibaraki 305-8634, Japan

<sup>6</sup>Department of Integrated Biosciences, Graduate School of Frontier Sciences, The University of Tokyo, Kashiwa, Chiba 277-8562, Japan

\*Correspondences to

Shingo Kikuta

Graduate School of Bio-Applications and Systems Engineering (BASE), Tokyo University of Agriculture and Technology, Koganei, Tokyo 184-8588, Japan

Tel: +81-42-388-7277; Fax: +81-42-388-7277; E-mail address: [singo@cc.tuat.ac.jp](mailto:singo@cc.tuat.ac.jp)

Takahiro Kikawada

Institute of Agrobiological Sciences, NARO, Tsukuba, Ibaraki 305-8634, Japan

Tel: +81-29-838-6170; Fax: +81-29-838-6157; E-mail address: [kikawada@affrc.go.jp](mailto:kikawada@affrc.go.jp)

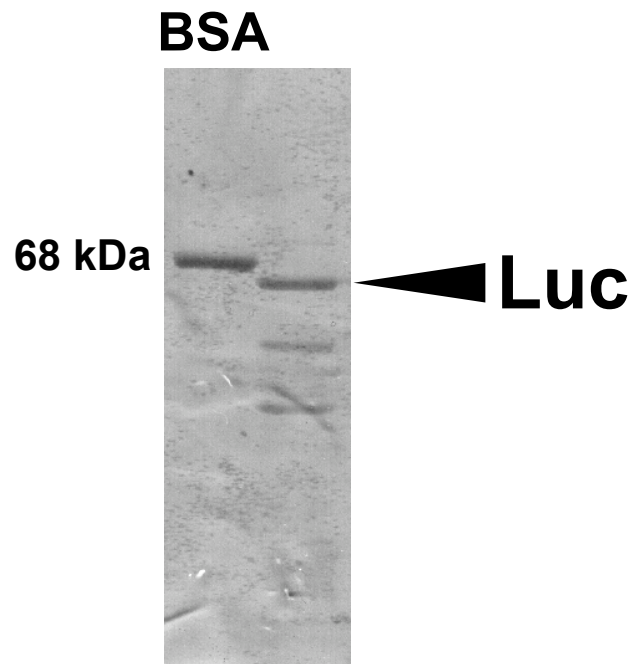

### Figure S1

Recombinant luciferase obtained from *E. coli*. The samples were denatured at 95°C in SDS-PAGE sample buffer, the lysates were subjected to SDS-PAGE with 10% acrylamide gels, and separated proteins were stained with Coomassie brilliant blue. Arrowhead shows luciferase (Luc). BSA was used as a positive control.

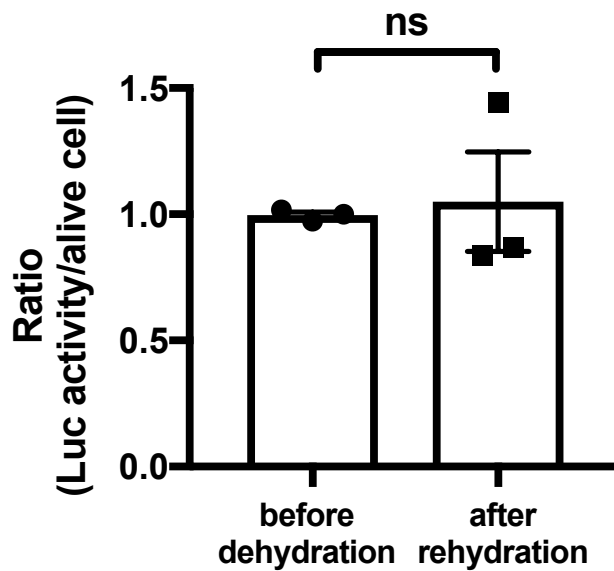

## Figure S2

Luciferase activity per surviving cell by the ratio after rehydration. Survival of Pv11-Luc cells was examined using the calcein staining. Cell counting was performed after pre incubation with 600 mM trehalose and 1 h after rehydration. Each value is shown as a scatter dot plot. Error bar shows standard error of mean ( $n = 3$ ). Statistical significance was evaluated with Mann-Whitney  $U$  test ( $p = 0.35$ ).

**A**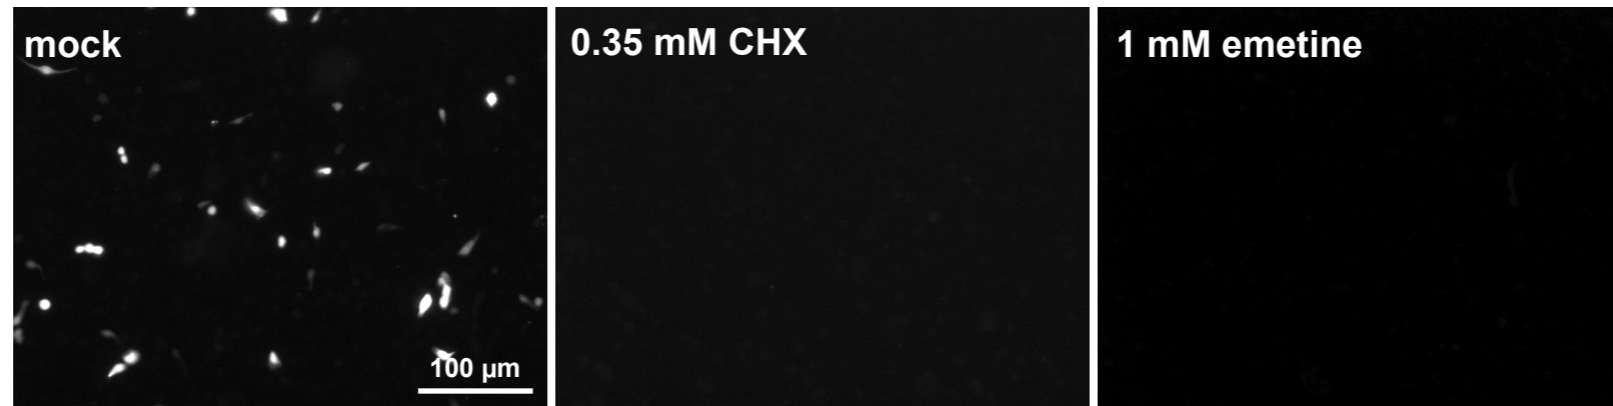**B**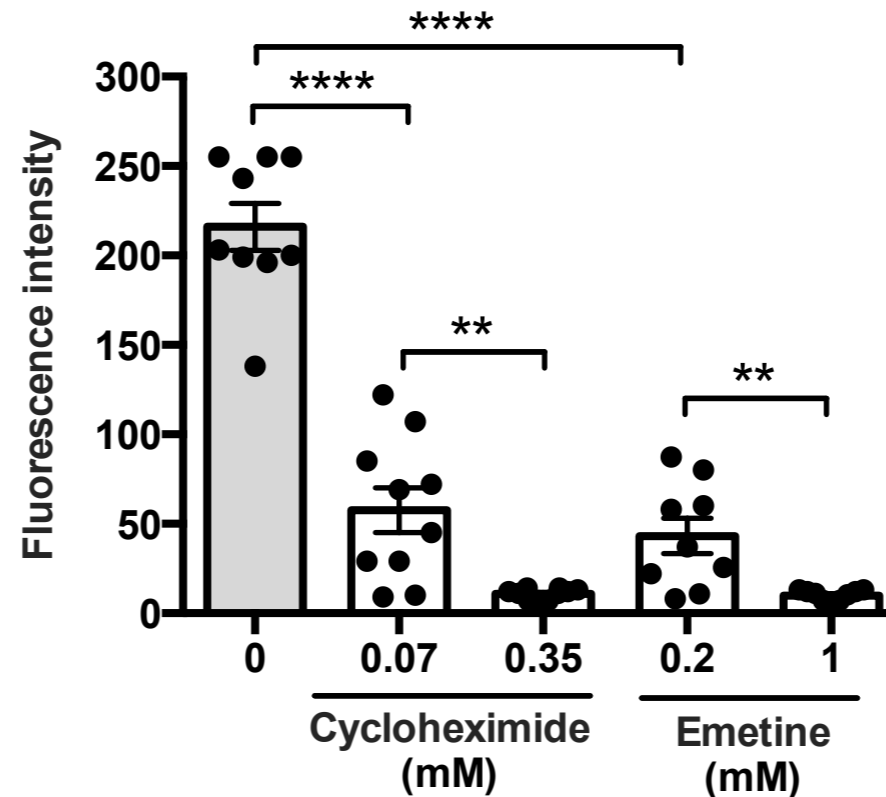**Figure S3**

The effective concentration range of translation inhibitors for Pv11 cells was determined using the transient gene expression system. AcGFP1 fluorescence was observed at 48 h after transfection into Pv11 cells. Each translation inhibitor in different concentrations was added into the culture medium after transfection to Pv11 cells. **A.** AcGFP1 fluorescence imaging. Mock shows the AcGFP1 fluorescence without inhibitor. **B.** Fluorescence intensity of AcGFP1 in randomly picked-up individual cells was measured 48 h after transfection, and is shown as a scatter dot plot. Error bar shows standard error of mean (n = 9–10). Statistical significance was calculated by using one-way ANOVA and Tukey’s multiple comparison test as a post hoc analysis (“\*\*\*\*” means significantly different  $p < 0.0001$ ; “\*\*” means  $p = 0.002$  for cycloheximide;  $p = 0.004$  for emetine; “ns” means not significantly different).
